# Supplementary material
Source: PubMed Central journal article supplement (PMC3605989)
Supplement: supp_M035733_jlr.M035733-1.pdf [file supp_M035733_jlr.M035733-1.pdf]

## Supplementary Information

### Metabolism of oxysterols derived from non-enzymatic oxidation of 7-dehydrocholesterol in cells

Libin Xu,<sup>†\*</sup> Zeljka Korade,<sup>††</sup> Dale A. Rosado, Jr.,<sup>†</sup> Karoly Mirmics,<sup>††</sup> Ned A. Porter<sup>†\*</sup>

<sup>†</sup>Department of Chemistry and Vanderbilt Institute of Chemical Biology, <sup>††</sup>Department of Psychiatry and Vanderbilt Kennedy Center for Research on Human Development, Vanderbilt University, Nashville, Tennessee

37235

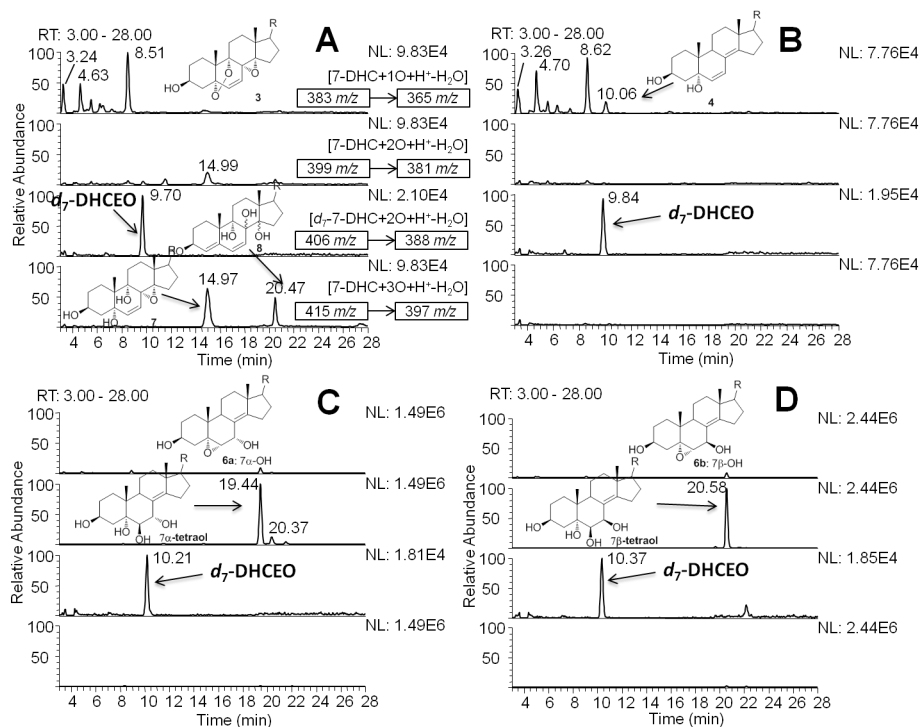

**Figure S1.** NP-HPLC-APCI-MS-MS (Silica 4.6 mm × 250 mm column; 5 μm; 1.0 mL/min; elution solvent: 2-propanol/hexanes = 10/90 (0 – 15 min), 19/81 (16 – 26 min), 10/90 (27 – 35 min)) analysis of the oxysterols in Neuro2a cells that were incubated in the presence of (A) 1 μM of **3**, (B) 5 μM of **4**, (C) 5 μM of **6a**, and (D) 5 μM **6b** for 24 hours in DMEM medium that was supplemented with regular FBS. The structures of the starting oxysterols in each experiment were shown in the corresponding chromatogram. The speculated structures of the metabolites of compounds **3**, **6a**, and **6b** were shown in the Figure based on the retention time (polarity) and MS characteristics of each peak. A known amount of *d*<sub>7</sub>-DHCEO was added to each sample as an internal standard so that retention time and peak intensities of the peaks can be compared between each run. The parent ion and the MS/MS transition were marked in each panel of S1A, and the same MS/MS transitions were monitored in every experiment.

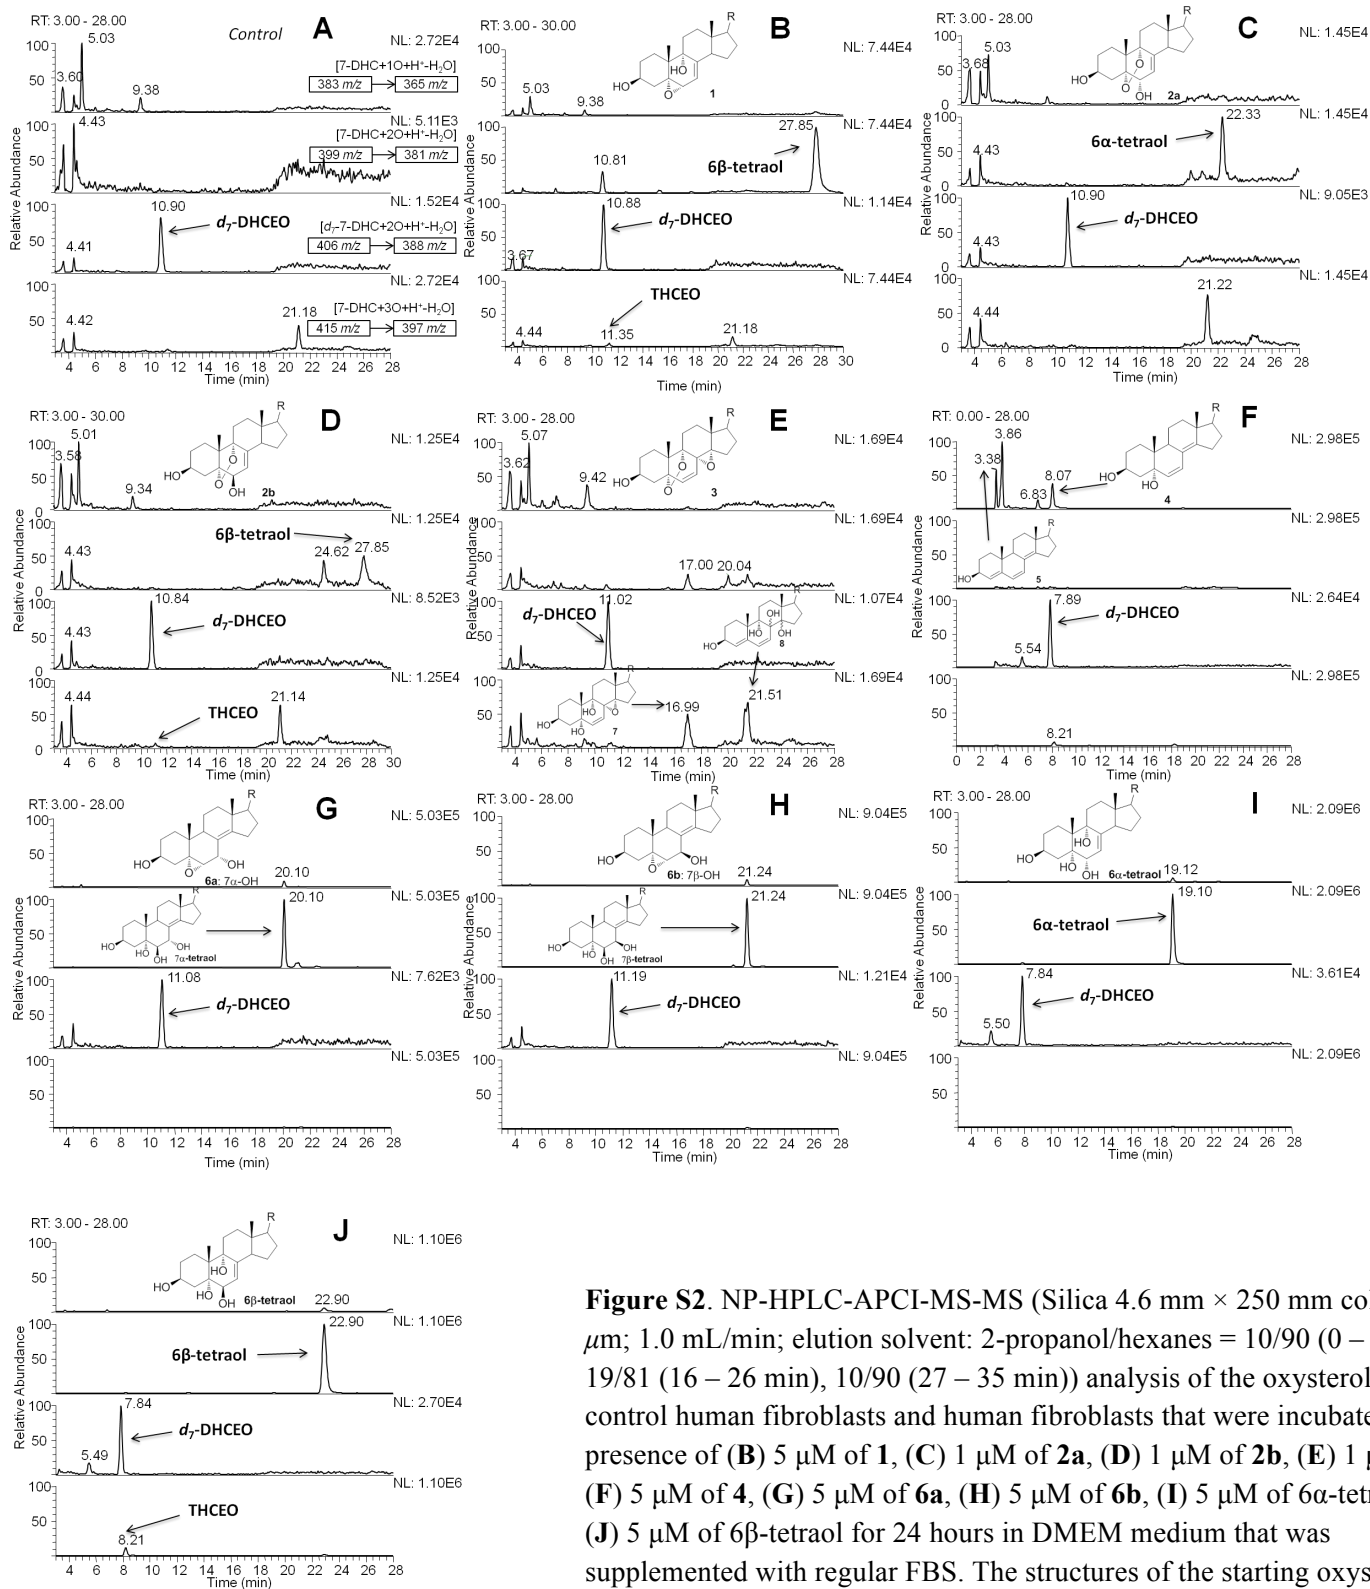

**Figure S2.** NP-HPLC-APCI-MS-MS (Silica 4.6 mm × 250 mm column; 5 μm; 1.0 mL/min; elution solvent: 2-propanol/hexanes = 10/90 (0 – 15 min), 19/81 (16 – 26 min), 10/90 (27 – 35 min)) analysis of the oxysterols in (A) control human fibroblasts and human fibroblasts that were incubated in the presence of (B) 5 μM of **1**, (C) 1 μM of **2a**, (D) 1 μM of **2b**, (E) 1 μM of **3**, (F) 5 μM of **4**, (G) 5 μM of **6a**, (H) 5 μM of **6b**, (I) 5 μM of **6α-tetraol**, and (J) 5 μM of **6β-tetraol** for 24 hours in DMEM medium that was supplemented with regular FBS. The structures of the starting oxysterols in each experiment were shown in the corresponding chromatogram. The speculated structures of the metabolites of compounds **3**, **6a**, and **6b** were shown in the Figure based on the retention time (polarity) and MS characteristics of each peak. A known amount of *d*<sub>7</sub>-DHCEO was added to each sample as an internal standard so that retention time and peak intensities of the peaks can be compared between each run. The parent ion and the MS/MS transition were marked in each panel of S2A, and the same MS/MS transitions were monitored in every experiment.
